# Supplementary material for: Ascorbic Acid Modulation by ABI4 Transcriptional Repression of VTC2 in The Salt Tolerance of Arabidopsis
Source: Research Square preprint supplement (doi:10.21203/rs.3.rs-116368/v1), 2020-12-08
Supplement: Supplementary file 1 [file 0f04b432c27dee0306409c7a.docx]

Ascorbic acid modulation by ABI4 transcriptional repression of *VTC2* in the salt tolerance of *Arabidopsis*

**Xiamusiya Kakan1, 5, Yanwen** **Yu2, Shenghui Li3, Xiaoying Li1, Rongfeng Huang1, 4, Juan Wang1, 4, ***

1 Biotechnology Research Institute, Chinese Academy of Agricultural Sciences, Beijing 100081, China

2College of Agronomy, Henan Agricultural University, Zhengzhou 450002, China

3College of Landscape and Ecological Engineering, Hebei University of Engineering, Handan 056038, China

4China National Key Facility of Crop Gene Resources and Genetic Improvement, Beijing 100081, China

5College of Agronomy, Xinjiang Agricultural University, Urumchi 830052, China

*** Correspondence:** [wangjuan@caas.cn](mailto:wangjuan@caas.cn) (J.W.)

**Supplemental Table 1. Primers used in this study**

| Primer name | Primer sequence (5' - 3' ) |
| --- | --- |
| AtABI4-F | CTTCCCAACATCAACACAAC |
| AtABI4-R | GGCATAACATAGAGGTCCCAC |
| AtVTC2-F | GCTTCCACCTTCAAAGAGAA |
| AtVTC2-R | CCAGTGTTGTTGCCATCA |
| qAtACTIN-F | GGCAAGTCATCACGATTGG |
| qAtACTIN-R | CAGCTTCCATTCCCACAAAC |
| qAtABI4-F | CGTTAGGGCAGGAACAAGGA |
| qAtABI4-R | ATAACCCGGATCCAGACCCA |
| Primer name | Primer sequence (5' - 3' ) |
| qAtVTC2-F | TTCAGACTGCTGTGTTTGCCT |
| qAtVTC2-R | CAATACCTCCGGGCTCACTT |
| qAtVTC1-F | CAAAACCGGTCCAACACCAGA |
| qAtVTC1-R | CTGAGCTGGGAAATGGCTGTA |
| qAtVTC4-F | GGATGAGTGGTTCGTGTGCA |
| qAtVTC4-R | CTCAGCGAATAACTCCTTGA |
| qAtVTC5-F | AATGTGAGTCCGATTGAGTA |
| qAtVTC5-R | AGTAAGCCTGAAAGTGAAGA |
| qAtGalDH-F | ATTTCGTCGGTGTTGGTTGG |
| qAtGalDH-R | CCACTTGGCCATGTCAGATT |
| qAtGLDH-F | GCAGATTGGTGGTATTATTC |
| qAtGLDH-R | GACCTCAGCAACAACTCC |
| qAtAPX1-F | ATTGCTTAATGTACTCTCGGATTTACG |
| qAtAPX1-R | CAAAAGCGCAACGGATGTG |
| qAtAPX2-F | CTGGTGGACACACCTTGGG |
| qAtAPX2-R | GCAGCATATTTTTCAACAAATGGGA |
| qAtAPX3-F | GTTCCGTCGTCTTGTTGAGC |
| qAtAPX3-R | GTCTGCAACTGCTTTGCCTG |
| qAtAPX4-F | ACTGACCCTCAAGTTGCTCC |
| qAtAPX4-R | GCCTCGAAGTTGATTTGCTGT |
| qAtAPX5-F | GCATGATGCAGGAACCTATGATG |
| qAtAPX5-R | ACGGTTTAGCTCTTCCTTGAATCTG |
| qAtAPX6-F | CGGCCCAACAATTCCAGTAGT |
| qAtAPX6-R | GAGGTAGCTTGCCTTCTGGATC |
| qAtAPX7-F | AAGTTACTGGTGGCCCTAAAATTC |
| qAtAPX7-R | GGGCTTGTCACTCTCAGGAATG |
